# Supplementary material for: A systematic review of the definitions and interpretations in scientific literature of ‘less but better’ meat in high-income settings
Source: Springer Nature journal article supplement (doi:10.1038/s43016-022-00536-5), 2022-06-23
Supplement: 43016_2022_536_MOESM1_ESM.pdf [file 43016_2022_536_MOESM1_ESM.pdf]

---

**Supplementary information**

---

**A systematic review of the definitions and interpretations in scientific literature of 'less but better' meat in high-income settings**

---

In the format provided by the authors and unedited

## Supplementary Material

*A systematic review of the definitions and interpretations in scientific literature of 'less but better' meat in high-income settings*

**Kajsa Resare Sahlin<sup>1</sup> & Joanna Trewern<sup>2</sup>**

1: Stockholm Resilience Centre at Stockholm University | [kajsa.resare.sahlin@su.se](mailto:kajsa.resare.sahlin@su.se)

2: Centre for Environment & Sustainability, University of Surrey | [j.trewern@surrey.ac.uk](mailto:j.trewern@surrey.ac.uk)

*Table S1: Bibliometrics of research on 'less but better' meat and dairy: journals, authors, affiliations, countries, years of publication with more than one entry, and scope of entries. \*first authors*

| Journal                         | Author                        | Affiliation                           | Country             | Year of publication | Scope            |
|---------------------------------|-------------------------------|---------------------------------------|---------------------|---------------------|------------------|
| Appetite (4)                    | Joop de Boer* (4)             | Vrije Universiteit (VU) Amsterdam (3) | UK (12)             | 2004 (1)            | Production (1)   |
| Sustainability (3)              | Chrysostomos Apostolidis* (2) | University of Wisconsin-Milwaukee (2) | The Netherlands (5) | 2011 (1)            | Consumption (23) |
| Food Quality and Preference (2) | Linnea Laestadius* (2)        | Northumbria University (2)            | USA (4)             | 2014 (3)            | Both (11)        |
| Meat Science (2)                | Hannah Schösler (3)           | City University London (2)            | Australia (2)       | 2015 (1)            | -                |
| -                               | R Neff (3)                    | -                                     | France (2)          | 2016 (3)            | -                |
| -                               | Harry Aiking (3)              | -                                     | Germany (2)         | 2017 (2)            | -                |
| -                               | Elin Rööös (2)                | -                                     | -                   | 2018 (6)            | -                |
| -                               | Nicolas Treich (2)            | -                                     | -                   | 2019 (9)            | -                |
| -                               | C Barry (2)                   | -                                     | -                   | 2020 (5)            | -                |
| -                               | S Frattaroli (2)              | -                                     | -                   | 2021 (4)            | -                |

*Table S2: Consumption-based approaches for reducing meat consumption and which studies address or discuss these*

| Consumption-based approaches | Articles                                                                                                                                            |
|------------------------------|-----------------------------------------------------------------------------------------------------------------------------------------------------|
| Portion size                 | de Boer (2014)<br>de Boer (2018)<br>Neff (2018)<br>Shimokawa (2015)<br>Trewern (2021)<br>Schösler (2018)<br>Jurgilevich (2016)<br>Laestadius (2014) |
| Meatless days                | de Boer (2014)<br>Neff (2018)<br>Santini (2017)<br>McEachern (2018)<br>Laestadius (2016)                                                            |

|                                                           |                                                                                                                                                               |
|-----------------------------------------------------------|---------------------------------------------------------------------------------------------------------------------------------------------------------------|
|                                                           | Morrias (2014)<br>Jurgilevich (2016)<br>Sahakian (2020)<br>Daly (2020)                                                                                        |
| Meat replacement or substitution                          | Apostolidis (2019)<br>McGregor (2018)<br>de Boer (2018)<br>Neff (2018)<br>de Boer (2014)<br>Apostolidis (2016)<br>Neff (2018)<br>Daly (2020)<br>Broad (2019)  |
| Alignment with dietary guidelines                         | de Boer (2019)<br>Klosse (2019)<br>Treich (2021)<br>Neff (2018)<br>Shimokawa (2015)<br>Trewern (2021)<br>Hyland (2017)<br>Santini (2017)<br>van Zanten (2018) |
| Change ratio of animal:plant protein                      | de Boer (2019)<br>de Boer (2018)                                                                                                                              |
| Stop overconsumption                                      | Hyland (2017)<br>Treich (2021)<br>van Zanten (2018)<br>Morris (2014)<br>Neff (2018)<br>Trewern (2021)<br>de Boer (2014)                                       |
| Cultural and habitual shift away from meat centered diets | Daly (2020)<br>Schösler (2018)<br>Caraher (2011)<br>de Boer (2018)<br>McGregor (2018)<br>Laestadius (2014)<br>de Boer (2014)<br>Jurgilevich (2016)            |

16

17 *Table S3: Sustainability themes referenced in selected articles*

| Sustainability theme                   | Subtheme(s)                 | Articles                                                                                                                                                                                                                                      |
|----------------------------------------|-----------------------------|-----------------------------------------------------------------------------------------------------------------------------------------------------------------------------------------------------------------------------------------------|
| Environmental sustainability (general) |                             | Apostolidis (2016, 2019), Capper (2020), de Boer (2014), Elkins (2019), Laestadius (2014, 2016), Loeb (2019a), McEachern (2018), McGregor (2018), Neff (2018), Pais (2020), Santini (2017), Shimokawa (2015), Schösler (2018), Trewern (2021) |
| Climate                                | Reduced emissions intensity | Apostolidis (2016, 2019), Capper (2020, 2021), de Boer & Aiking (2018), Hyland (2017), Laestadius (2014, 2016), McEachern (2018), McGregor (2018), Neff (2018), van Zanten (2018)                                                             |

|                            |                          |                                                                                                                                                                                                                                                                                                |
|----------------------------|--------------------------|------------------------------------------------------------------------------------------------------------------------------------------------------------------------------------------------------------------------------------------------------------------------------------------------|
|                            | Reduced stocking density | Hölker, von Meyer-Höfer & Spiller (2019), Lang & Millstone (2019), Loeb (2019a), McGregor (2018), Santini (2017), van Zanten (2018)                                                                                                                                                            |
|                            | Carbon sequestration     | Capper (2021), Hyland (2017), Klosse (2019), Laestadius (2016), McGregor (2018), van Zanten (2018)                                                                                                                                                                                             |
| Land                       | Land use intensity       | Capper (2020), McGregor (2018), Trewern (2021)                                                                                                                                                                                                                                                 |
|                            | Feed-food competition    | Capper (2020, 2021), de Boer (2014), Hyland (2017), Jurgilevich (2016), Klosse (2019), Laestadius (2016), Lang & Millstone (2019), McGregor (2018), Morris (2014), Pais (2020), Schösler (2018), Trewern (2021), van Zanten (2018)                                                             |
| Biodiversity               |                          | Capper (2021), Jurgilevich (2016), Klosse (2019), Laestadius (2016)                                                                                                                                                                                                                            |
| Freshwater use             |                          | Capper (2020), de Boer (2014), Schösler (2018)                                                                                                                                                                                                                                                 |
| Eutrophication             |                          | Jurgilevich (2016), van Zanten (2018)                                                                                                                                                                                                                                                          |
| Energy use                 |                          | de Boer (2014), Schösler (2018)                                                                                                                                                                                                                                                                |
| Animal welfare             |                          | Apostolidis (2019), Capper (2020, 2021), Daly (2020), de Boer (2014), Elkins (2019), Espinosa & Treich (2021), Hyland (2017), Laestadius (2016), Loeb (2019a), McEachern (2018), McGregor (2018), Morris (2014), Neff (2018), Sahakian (2020), Santini (2017), Schösler (2018), Trewern (2021) |
| Technology use             | GMOs                     | Apostolidis (2016, 2019), Capper (2020), Guzek (2020), Loeb (2019b), McGregor (2018), Morris (2014)                                                                                                                                                                                            |
|                            | Hormones                 | Lang & Millstone (2019), McGregor (2018)                                                                                                                                                                                                                                                       |
|                            | Antimicrobials           | Laestadius (2016), Sahakian (2020)                                                                                                                                                                                                                                                             |
| Livestock as land managers |                          | Capper (2021), McGregor (2018)                                                                                                                                                                                                                                                                 |
| Local                      |                          | Jurgilevich (2016), Klosse (2019), McEachern (2018), McGregor (2018), Sahakian (2020), Trewern (2021), Verbeke & Vackier (2004)                                                                                                                                                                |
| Farmer livelihoods         |                          | Laestadius (2016)                                                                                                                                                                                                                                                                              |
| Certified                  |                          | Apostolidis (2016, 2019), Capper (2020), de Boer & Aiking (2018), Guzek (2020), McEachern (2018), McGregor (2018), Santini (2017), Trewern (2021), Verbeke & Vackier (2004)                                                                                                                    |
| Public health              |                          | De Boer (2014), Guzek (2020), Jurgilevich (2016), Laestadius (2014), McEachern (2018), Morris (2014), Neff (2018), Pais (2020), Santini (2017), Trewern (2021)                                                                                                                                 |
| Nutritional quality        | General                  | Capper (2020), Caraher (2011), Guzek (2020)                                                                                                                                                                                                                                                    |
|                            | Fat content              | Apostolidis (2016, 2019), Guzek (2020)                                                                                                                                                                                                                                                         |
| Eating quality             |                          | Apostolidis (2016, 2019), de Boer & Aiking (2018, 2019), Daly (2020), Sahakian (2020), Schösler (2018), Verbeke & Vackier (2004)                                                                                                                                                               |

18

19 *Figure S1: Production systems referenced in selected articles. Figure shows the number of articles that*  
 20 *production systems were mentioned in.*

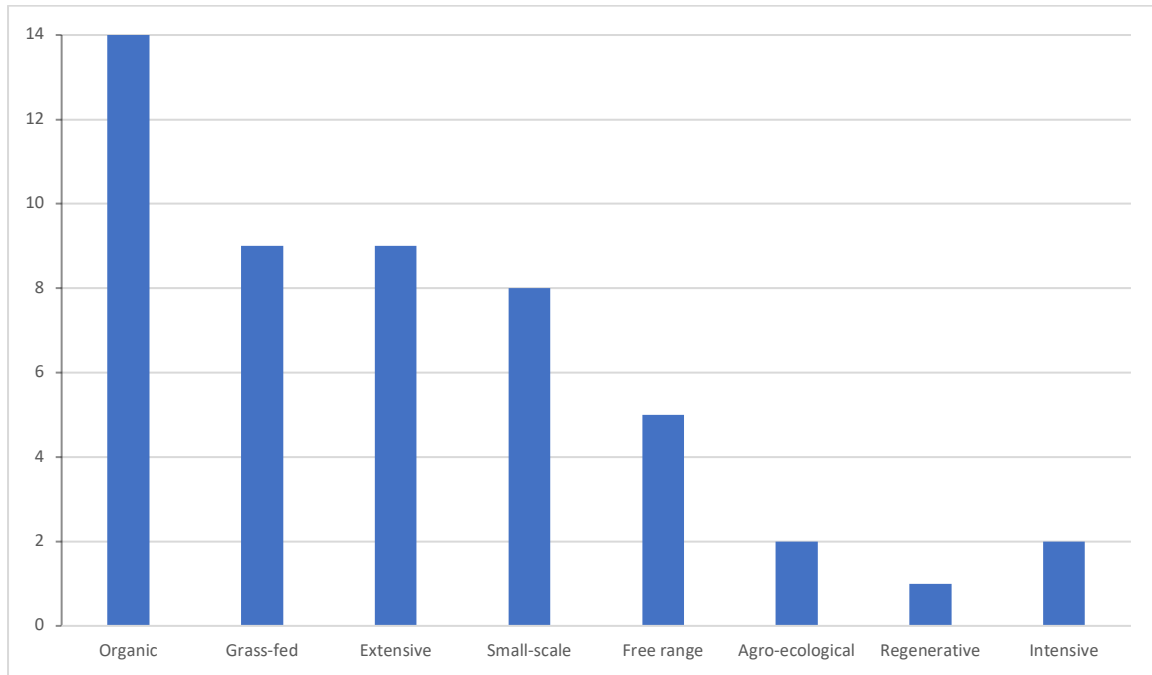

21

22

23 *Table S4: Overview of uses, definitions and interpretations of 'less and better' in selected studies*

| Author, year               | Country of first author | Scope       | Definition of 'less but better'                                                                                                                                                                                                                                                                                         | Sustainability themes                                                                                                                    | Farming systems                                                |
|----------------------------|-------------------------|-------------|-------------------------------------------------------------------------------------------------------------------------------------------------------------------------------------------------------------------------------------------------------------------------------------------------------------------------|------------------------------------------------------------------------------------------------------------------------------------------|----------------------------------------------------------------|
| Apostolidis & McLeay, 2016 | UK                      | Consumption | "more sustainable meat consumption patterns"<br>Metrics used for 'better' - carbon footprint, origin of production, method of production (through certification), fat content                                                                                                                                           | -Environmental sustainability<br>-Climate<br>-Nutritional quality<br>-Eating quality<br>-Technology use<br>-Certified                    | -Organic<br>-Small-scale                                       |
| Apostolidis & McLeay, 2019 | UK                      | Consumption | "Consumer empowerment' can refer to 'meat eaters', who purposefully purchase more sustainable meat, as well as 'meat reducers' who decide to consume 'less but better' meat products."<br>Metrics used for 'better' - carbon footprint, origin of production, method of production (through certification), fat content | -Environmental sustainability<br>-Climate<br>-Animal welfare<br>-Nutritional quality<br>-Eating quality<br>-Technology use<br>-Certified | -Organic<br>-Small-scale                                       |
| Broad, 2019                | USA                     | Both        | "produced through agro-ecological and smallholder farming methods"                                                                                                                                                                                                                                                      |                                                                                                                                          | -Agro-ecological<br>-Small-scale                               |
| Capper, 2020               | UK                      | Both        | "Improved animal welfare, environmental impacts, or nutritional quality."                                                                                                                                                                                                                                               | -Environmental sustainability<br>-Climate<br>-Land use<br>-Freshwater use<br>-Animal welfare<br>-Nutritional quality<br>-Technology      | -Organic<br>-Pasture/grass-fed<br>-Sustainable intensification |

|                                         |                     |             |                                                                                                                                                                                                                                                                                                                                                                                                                                |                                                                                                                                      |                                                                                             |
|-----------------------------------------|---------------------|-------------|--------------------------------------------------------------------------------------------------------------------------------------------------------------------------------------------------------------------------------------------------------------------------------------------------------------------------------------------------------------------------------------------------------------------------------|--------------------------------------------------------------------------------------------------------------------------------------|---------------------------------------------------------------------------------------------|
|                                         |                     |             |                                                                                                                                                                                                                                                                                                                                                                                                                                | use<br>-Certified                                                                                                                    |                                                                                             |
| Capper, 2021                            | UK                  | Consumption | "British meat, milk and eggs, and ensuring high standards of animal welfare, low carbon footprints and excellent traceability"                                                                                                                                                                                                                                                                                                 | -Climate<br>-Biodiversity<br>-Land use<br>-Livestock as land managers<br>-Animal welfare                                             | -Organic                                                                                    |
| Caraher, 2011                           | UK                  | Consumption | "If you do eat flesh (fish or meat), choose that which has run/swum as wild /free-range as possible; the nutrients are different"                                                                                                                                                                                                                                                                                              | -Nutritional quality                                                                                                                 | -Extensive                                                                                  |
| Daly, 2020                              | Australia           | Consumption | "ameliorative productivity...exemplified by civil society campaigns that encourage "Less But Better" meat"                                                                                                                                                                                                                                                                                                                     | -Animal welfare<br>-Eating quality                                                                                                   |                                                                                             |
| de Boer & Aiking, 2018                  | The Netherlands     | Consumption | "eating less meat but of a certified origin and replacing beef or pork with poultry or fish"                                                                                                                                                                                                                                                                                                                                   | -Climate<br>-Certified                                                                                                               | -Small-scale                                                                                |
| de Boer & Aiking, 2019                  | The Netherlands     | Consumption | "reduce total protein intake as well as the dietary ratio of animal over plant protein (from 60:40 via 50:50 to 40:60)"                                                                                                                                                                                                                                                                                                        | -Eating quality                                                                                                                      |                                                                                             |
| De Boer, Schösler & Aiking, 2014        | The Netherlands     | Consumption | "smaller portions using meat raised in a more sustainable manner...it favors extensively produced meat, such as organic and free-range meat, over intensively produced meat.<br><br>As Dutch consumers had no shopping-aid to distinguish grass-fed meat at the time, "better" meat was defined as "organic or free range meat""                                                                                               | -Environmental sustainability<br>-Energy use<br>-Land use<br>-Freshwater use<br>-Animal welfare<br>-Public health<br>-Eating quality | -Organic<br>-Pasture/grass-fed<br>-Extensive                                                |
| Elkins, 2019                            | UK                  | Consumption | "Maintaining proportional spend on meat, but paying a higher price per unit where welfare and environmental stability is exceptional"                                                                                                                                                                                                                                                                                          | -Environmental sustainability<br>-Animal welfare                                                                                     |                                                                                             |
| Espinosa & Treich, 2021                 | France              | Consumption | "whether farm animals' lives are worth living"                                                                                                                                                                                                                                                                                                                                                                                 | -Animal welfare                                                                                                                      |                                                                                             |
| Guzek et al., 2020                      | Poland              | Consumption | "adding more health-promoting components to meat-based food products and improving their nutritional value"                                                                                                                                                                                                                                                                                                                    | -Nutritional quality<br>-Public health<br>-Eating quality<br>-Technology use<br>-Certified                                           | -Organic<br>-Small-scale                                                                    |
| Hölker, von Meyer-Höfer & Spiller, 2019 | Germany             | Consumption | "the significant reduction of farm animal production by each farm and in total in order to improve the production standards for the remaining animals"                                                                                                                                                                                                                                                                         | -Climate                                                                                                                             |                                                                                             |
| Hyland et al., 2017                     | Republic of Ireland | Both        | "Meat can be defined as 'better' if it achieves a spectrum of outcomes for climate change, the environment, animal welfare, human health, livelihoods, social justice and social values."                                                                                                                                                                                                                                      | -Climate<br>-Land use<br>-Animal welfare                                                                                             | -Extensive<br>-Sustainable intensification                                                  |
| Jurgilevich et al., 2016                | Finland             | Both        | "consuming smaller portions of meat obtained from extensive production, such as organic or free-range."                                                                                                                                                                                                                                                                                                                        | -Biodiversity<br>-Land use<br>-Eutrophication<br>-Local<br>-Public health                                                            | -Circular<br>-Organic<br>-Pasture/grass-fed<br>-Small-scale<br>-Mixed<br>-CSA<br>-Game meat |
| Klosse, 2019                            | The Netherlands     | Both        | "Animals are a part of a well-balanced agricultural system. This implies that we need to consume less, but better meat and animal products.<br><br>We want to conclude our discussion on products with the question of whether there will still be meat on the menu in the future. The answer is a big "yes". It should not even be a question because animals are essential in a regenerative, circular agricultural system." | -Climate<br>-Biodiversity<br>-Land use<br>-Local                                                                                     | -Circular<br>-Organic<br>-Regenerative<br>-Mixed                                            |
| Laestadius et al., 2014                 | USA                 | Consumption | "meat from extensive livestock operations (with potentially higher GHG emissions per unit of meat, but better outcomes across other environmental metrics."                                                                                                                                                                                                                                                                    | -Environmental sustainability<br>-Climate<br>-Public health                                                                          | -Pasture/grass-fed                                                                          |
| Laestadius et al., 2016                 | USA                 | Consumption | "encouraging consumers to switch to meat from ruminant grass-fed animals"                                                                                                                                                                                                                                                                                                                                                      | -Environmental sustainability                                                                                                        | -Organic<br>-Extensive                                                                      |

|                              |             |             |                                                                                                                                                                                                                                                                                                                                                                                                                                                                                                                                                           |                                                                                                                                                     |                                                                                      |
|------------------------------|-------------|-------------|-----------------------------------------------------------------------------------------------------------------------------------------------------------------------------------------------------------------------------------------------------------------------------------------------------------------------------------------------------------------------------------------------------------------------------------------------------------------------------------------------------------------------------------------------------------|-----------------------------------------------------------------------------------------------------------------------------------------------------|--------------------------------------------------------------------------------------|
|                              |             |             |                                                                                                                                                                                                                                                                                                                                                                                                                                                                                                                                                           | -Climate<br>-Biodiversity<br>-Land use<br>-Farmer livelihoods<br>-Animal welfare<br>-Technology use                                                 | -Pasture/grass-fed<br>-Small-scale                                                   |
| Lang & Millstone, 2019       | UK          | Both        | "We need fewer cattle, not more...and livestock back into their ecological niches"                                                                                                                                                                                                                                                                                                                                                                                                                                                                        | -Climate<br>-Land use<br>-Technology use                                                                                                            |                                                                                      |
| Loeb, 2019 (a)               | UK          | Both        | "fewer healthier and happier animals with better productivity have less of an impact at all levels compared to numerous animals with poorer health and welfare outcomes. Considering sustainable consumption and production together can therefore have a positive impact on animal welfare and provide an opportunity to drive consumer demand for high animal welfare products."                                                                                                                                                                        | -Environmental sustainability<br>-Climate<br>-Animal welfare                                                                                        |                                                                                      |
| Loeb, 2019 (b)               | UK          | Consumption | "some citizens' would maintain a similar weekly spend on their groceries but would...consume animal-derived products less frequently and, when you do, opt for more expensive products associated with higher health and welfare. Also, minimise waste—so use the whole carcass when cooking a chicken"                                                                                                                                                                                                                                                   | -Technology use                                                                                                                                     |                                                                                      |
| McEachern, 2018              | UK          | Consumption | "calls for consumers to eat less meat and support farming systems that benefit the environment, health and animal welfare"                                                                                                                                                                                                                                                                                                                                                                                                                                | -Environmental sustainability<br>-Climate<br>-Local<br>-Animal welfare<br>-Public health<br>-Certified                                              | -Small-scale                                                                         |
| McGregor & Houston, 2018     | Australia   | Both        | "People are encouraged to "eat environmentally", which means eating less, but better quality and more humanely produced cattle products. Caring translates in practice to eating products from grass-fed organic farms and avoiding feedlots."                                                                                                                                                                                                                                                                                                            | -Environmental sustainability<br>-Climate<br>-Land use<br>-Livestock as land managers<br>-Local<br>-Animal welfare<br>-Technology use<br>-Certified | -Organic<br>-Extensive<br>-Pasture/grass-fed<br>-Small-scale<br>-Mixed<br>-Game meat |
| Morris, Kirwan & Lally, 2014 | UK          | Consumption | "preferably free range meat products. Eliminating meat from your diet for one day a week will result in a saving...That saving can be used to buy healthier and more humane free-range meat.<br><br>reduce our reliance on large scale industrial farming systems and instead give our support to the farmers who are operating on a less industrial scale. If we all eat less meat, but choose better quality meat when we do buy it, rather than cheap imported meat, we will be supporting our own farmers and helping to promote good animal welfare" | -Land use<br>-Animal welfare<br>-Public health<br>-Technology use                                                                                   | -Extensive<br>-Pasture/grass-fed<br>-Small-scale                                     |
| Neff et al., 2018            | USA         | Consumption | "better meats' promoted as sustainable or animal-friendly. These products may still have negative effects, because marketing can be misleading and because environmental impacts are often mixed. For example, despite the many environmental benefits of grass-fed beef, the greenhouse gas emissions differ little from feedlot beef"                                                                                                                                                                                                                   | -Environmental sustainability<br>-Climate<br>-Animal welfare<br>-Public health                                                                      | -Pasture/grass-fed                                                                   |
| Pais et al., 2020            | Portugal    | Consumption | "The meat sector, including farmers, should specialize in high-quality meat products that are highly efficient in terms of resources (more sustainable) and with minimized health consequences (healthier)...limiting livestock to pasture could be an efficient option in terms of resources."                                                                                                                                                                                                                                                           | -Environmental sustainability<br>-Land use<br>-Public health                                                                                        | -Organic<br>-Small-scale                                                             |
| Sahakian, 2020               | Switzerland | Consumption | "ideas of national culture and traditions, of family values, and of authentic lifestyles are also present, but are                                                                                                                                                                                                                                                                                                                                                                                                                                        | -Land use<br>-Local                                                                                                                                 | -Organic<br>-Small-scale                                                             |

|                                                                                                                                                                                                                                                                                                                                                                                                                                                                       |                 |             |                                                                                                                                                                                                                                                                                                                                                                                                                                                                                                                                                                                     |                                                                                                                    |                                        |
|-----------------------------------------------------------------------------------------------------------------------------------------------------------------------------------------------------------------------------------------------------------------------------------------------------------------------------------------------------------------------------------------------------------------------------------------------------------------------|-----------------|-------------|-------------------------------------------------------------------------------------------------------------------------------------------------------------------------------------------------------------------------------------------------------------------------------------------------------------------------------------------------------------------------------------------------------------------------------------------------------------------------------------------------------------------------------------------------------------------------------------|--------------------------------------------------------------------------------------------------------------------|----------------------------------------|
|                                                                                                                                                                                                                                                                                                                                                                                                                                                                       |                 |             | second to the relationship between animals and humans, which is presented both in a negative and a positive way...Entrails and giblets [are] often linked to the idea of 'less and better meat' as they are understood as reducing food waste"                                                                                                                                                                                                                                                                                                                                      | -Animal welfare<br>-Eating quality<br>-Technology use                                                              |                                        |
| Santini et al., 2017                                                                                                                                                                                                                                                                                                                                                                                                                                                  | Spain           | Both        | "oriented towards a reduction of individual meat consumption but jointly with purchases favouring meat proceeding from more extensive farming systems and/or of higher quality"                                                                                                                                                                                                                                                                                                                                                                                                     | -Environmental sustainability<br>-Climate<br>-Animal welfare<br>-Public health<br>-Certified                       | -Extensive                             |
| Schösler & de Boer, 2018                                                                                                                                                                                                                                                                                                                                                                                                                                              | Germany         | Consumption | "the world's future protein supply can only be ensured by making a transition to 1) a diet lower in meat, accompanied by 2) a shift away from industrially produced meat (grainfed livestock) to extensive meat production based on grazing livestock. The latter do not compete with humans for arable land, water and energy, and their meat is considered much less problematic from health and sustainability perspectives."                                                                                                                                                    | -Environmental sustainability<br>-Energy use<br>-Land use<br>-Freshwater use<br>-Animal welfare<br>-Eating quality | -Organic<br>-Extensive<br>-Small-scale |
| Shimokawa, 2015                                                                                                                                                                                                                                                                                                                                                                                                                                                       | Hong Kong       | Consumption | "a reduction in the quantity of meat consumed ("less meat approach"), and the enhancing of environmental and ethical quality attributes of meat ("better meat approach").<br><br>Chinese consumers prefer industrial large-size farming, compared to traditional small family farming, because they believe that industrial farming can provide safe and lean meat with a consistent quality...the finding indicates that a key driving factor is safety rather than the production system itself"                                                                                  | -Environmental sustainability                                                                                      | -Small-scale                           |
| Treich, 2021                                                                                                                                                                                                                                                                                                                                                                                                                                                          | France          | Both        | "produced through agro-ecological and smallholder farming methods"                                                                                                                                                                                                                                                                                                                                                                                                                                                                                                                  |                                                                                                                    | -Agro-ecological<br>-Small-scale       |
| Trewern et al., 2021                                                                                                                                                                                                                                                                                                                                                                                                                                                  | UK              | Both        | "In the UK, 'less' is interpreted as a 50% reduction in average per capita meat and dairy consumption, while 'better' reflects meat and dairy production in "healthy ecosystems, favouring more natural diets from sustainable sources, in well managed farms that deliver high standards of animal welfare""                                                                                                                                                                                                                                                                       | -Environmental sustainability<br>-Land use<br>-Local<br>-Animal welfare<br>-Public health<br>-Certified            | -Organic<br>-Extensive<br>-Small-scale |
| van Zanten et al., 2018                                                                                                                                                                                                                                                                                                                                                                                                                                               | The Netherlands | Production  | "livestock raised under the circular economy concept could provide a significant, nonnegligible part (9–23 g/per capita) of our daily protein needs (~50–60 g/per capita).<br><br>decoupling of production of livestock feed from the use of arable land. Livestock then mainly convert leftovers from arable land and grass resources into food. Global production of ASF is thereby limited by the quantity and quality of these biomass streams. Thus, the availability of these biomass streams for livestock determines the boundary of livestock production and consumption." | -Climate<br>-Land use<br>-Eutrophication                                                                           | -Circular<br>-Pasture/grass-fed        |
| Verbeke & Vackier, 2004                                                                                                                                                                                                                                                                                                                                                                                                                                               | Belgium         | Consumption | "consumers who strongly reduced their meat consumption frequency (from daily to several times a week) since the meat safety crises of previous years. They report high levels of concern related to meat safety and have the strongest intention to further decrease fresh meat consumption...Their preference for butchers as suppliers of fresh meat fits with their search for better (perceived) quality meat and personal reassurance."                                                                                                                                        | -Local<br>-Eating quality<br>-Certified                                                                            |                                        |
| <p><b>NB. Climate</b> refers to either reduced emissions intensities, reduced stocking densities or carbon sequestration. <b>Land use</b> refers to either land use intensity or feed-food competition. <b>Public health</b> refers to general statements on 'healthier' meat and links between meat consumption and non-communicable diet related diseases. <b>Technology use</b> refers to the use of hormones, GMOs or antimicrobials in livestock production.</p> |                 |             |                                                                                                                                                                                                                                                                                                                                                                                                                                                                                                                                                                                     |                                                                                                                    |                                        |



| Source                                       | Concerns                                                                     | Context     | Number                                                                                        | Unit           | CONVERSIONS  |                                                                | Notes                                                                                                                                                                                                                                                                                                                                                                                                                                           |
|----------------------------------------------|------------------------------------------------------------------------------|-------------|-----------------------------------------------------------------------------------------------|----------------|--------------|----------------------------------------------------------------|-------------------------------------------------------------------------------------------------------------------------------------------------------------------------------------------------------------------------------------------------------------------------------------------------------------------------------------------------------------------------------------------------------------------------------------------------|
|                                              |                                                                              |             |                                                                                               |                | Meat         | Meat protein<br>Assuming<br>20 % protein<br>content in<br>meat |                                                                                                                                                                                                                                                                                                                                                                                                                                                 |
|                                              |                                                                              |             |                                                                                               |                | g/capita/day | g/capita/day                                                   |                                                                                                                                                                                                                                                                                                                                                                                                                                                 |
| FAO STAT, Food balance sheet for 2018, World | Food supply quantity, Meat (Total)                                           | Global      | 43                                                                                            | kg/capita/year | 120          |                                                                | Meat (Total) includes: Bovine, poultry, pig, mutton, goat & other Slaughter weight                                                                                                                                                                                                                                                                                                                                                              |
| FAO STAT, Food balance sheet for 2018, World | Protein supply quantity, Meat (Total)                                        | HIC average | 29                                                                                            | g/capita/day   |              | 29.4                                                           | HIC: (see next tab). According to World Bank List of Economies (2018)                                                                                                                                                                                                                                                                                                                                                                           |
| FAO STAT, Food balance sheet for 2018, World | Protein supply quantity, Meat (Total)                                        | Global      | 14.5                                                                                          | g/capita/day   |              | 14.5                                                           | Meat (Total) includes: Bovine, poultry, pig, mutton, goat & other                                                                                                                                                                                                                                                                                                                                                                               |
| van Zanten et al. 2018                       | "Sustainable" total output of protein from ecological leftovers.             | Global      | 0-19 NB! Incl. Milk & eggs, 9-23                                                              | g/capita/day   |              | 0 - 19                                                         |                                                                                                                                                                                                                                                                                                                                                                                                                                                 |
| van Zanten et al. 2018                       | "Sustainable" total output of animal-source foods from ecological leftovers. | Global      | 7-135 g of pork<br>2-55 g of beef<br>2-14 g of chicken<br>138-519 g of milk<br>2-24 g of eggs | g/capita/day   | 11-70        |                                                                |                                                                                                                                                                                                                                                                                                                                                                                                                                                 |
| de Boer & Aiking (2019)                      | Meat protein                                                                 | Netherlands | 14-21                                                                                         | g/capita/day   | 70-100       | 14-21                                                          | "In units that are comparable to those of Table 1, the maximum is 14-21 g meat protein per person/day (assuming that 100 g fresh meat contains 20-30 g protein). This calls for a one-third reduction of the amounts in Table 1."                                                                                                                                                                                                               |
| Apostolidis et al. (2016)                    | Meat consumption                                                             | UK          | 70                                                                                            | g/capita/day   | 70           | 14                                                             | Apostolidis et al., 2016 suggests a 70 % reduction, equalling: "from an average 226 g/day for men and 163 g/day for women today, to about 70 g per person/day". UK figures.                                                                                                                                                                                                                                                                     |
| Pais et al. (2020)                           | Meat consumption                                                             | Global      | 90, with no more than 50 of red meat                                                          | g/capita/day   | 90 (50)      | 18 (10)                                                        | Analyses a 50 % reduction as suggested by Westhoek et al. (2014), but assess their results against the 90 g limit suggested by McMichael (2007) Westhoek, H., et al. (2014). Food choices, health and environment: effects of cutting Europe's meat and dairy intake. Global Environmental Change, 26(1), 196-205. McMichael, A. J. et al (2007). Food, livestock production, energy, climate change, and health. Lancet, 370(9594), 1253-1263. |

|                            |                     |        |            |                               |     |    |                                                                                                                                                                                                                                                                                                                                                                                                             |
|----------------------------|---------------------|--------|------------|-------------------------------|-----|----|-------------------------------------------------------------------------------------------------------------------------------------------------------------------------------------------------------------------------------------------------------------------------------------------------------------------------------------------------------------------------------------------------------------|
| Neff et al. (2018)         | Meat, poultry, eggs | US     | 737<br>105 | g/capita/week<br>g/capita/day |     |    | State that there is a 20-60 % excess consumption among US consumers of total meat consumption compared to the US dietary guidelines: protein foods should be limited to 5.5 oz/day & 'meats, poultry, eggs' to 26 oz/week"<br><a href="https://health.gov/sites/default/files/2019-09/2015-2020_Dietary_Guidelines.pdf">https://health.gov/sites/default/files/2019-09/2015-2020_Dietary_Guidelines.pdf</a> |
| Hölker et al. (2019)       | Animal source foods | Global | 50-75      | % reduction                   |     |    | Uses figure from EAT-Lancet                                                                                                                                                                                                                                                                                                                                                                                 |
| Trewern et al. (2021)      | Meat                | UK     | 50         | % reduction                   | 110 | 22 | "In the UK, 'less' is interpreted as a 50% reduction in average per capita meat and dairy consumption". Which would be equivalent to reducing meat consumption by 40 kilos per person per year from a 2017 baseline of 80 kg (slaughter weight)                                                                                                                                                             |
| EAT-Lancet (for reference) | Meat                | Global | 0-86       | g/capita/day                  |     | 17 |                                                                                                                                                                                                                                                                                                                                                                                                             |

26

27 **PRISMA 2020 CHECKLIST**

| Section and Topic       | Item # | Checklist item                                                                                                                                                                                                                                                                                       | Location where item is reported |
|-------------------------|--------|------------------------------------------------------------------------------------------------------------------------------------------------------------------------------------------------------------------------------------------------------------------------------------------------------|---------------------------------|
| <b>TITLE</b>            |        |                                                                                                                                                                                                                                                                                                      |                                 |
| Title                   | 1      | Identify the report as a systematic review.                                                                                                                                                                                                                                                          | Line 1-2                        |
| <b>ABSTRACT</b>         |        |                                                                                                                                                                                                                                                                                                      |                                 |
| Abstract                | 2      | See the PRISMA 2020 for Abstracts checklist.                                                                                                                                                                                                                                                         | Line 13-24                      |
| <b>INTRODUCTION</b>     |        |                                                                                                                                                                                                                                                                                                      |                                 |
| Rationale               | 3      | Describe the rationale for the review in the context of existing knowledge.                                                                                                                                                                                                                          | Line 40-44                      |
| Objectives              | 4      | Provide an explicit statement of the objective(s) or question(s) the review addresses.                                                                                                                                                                                                               | Line 44-47                      |
| <b>METHODS</b>          |        |                                                                                                                                                                                                                                                                                                      |                                 |
| Eligibility criteria    | 5      | Specify the inclusion and exclusion criteria for the review and how studies were grouped for the syntheses.                                                                                                                                                                                          | Line 52, Table 2                |
| Information sources     | 6      | Specify all databases, registers, websites, organisations, reference lists and other sources searched or consulted to identify studies. Specify the date when each source was last searched or consulted.                                                                                            | Line 250-251                    |
| Search strategy         | 7      | Present the full search strategies for all databases, registers and websites, including any filters and limits used.                                                                                                                                                                                 | Line 254-256, Table 2           |
| Selection process       | 8      | Specify the methods used to decide whether a study met the inclusion criteria of the review, including how many reviewers screened each record and each report retrieved, whether they worked independently, and if applicable, details of automation tools used in the process.                     | Line 259-266                    |
| Data collection process | 9      | Specify the methods used to collect data from reports, including how many reviewers collected data from each report, whether they worked independently, any processes for obtaining or confirming data from study investigators, and if applicable, details of automation tools used in the process. | Line 269-281                    |
| Data items              | 10a    | List and define all outcomes for which data were sought. Specify whether all results that were compatible with each outcome domain in each study were sought (e.g. for all measures, time points, analyses), and if not, the methods used to decide which results to collect.                        | Line 278-281, Table 2           |

| Section and Topic             | Item # | Checklist item                                                                                                                                                                                                                                                                       | Location where item is reported |
|-------------------------------|--------|--------------------------------------------------------------------------------------------------------------------------------------------------------------------------------------------------------------------------------------------------------------------------------------|---------------------------------|
|                               | 10b    | List and define all other variables for which data were sought (e.g. participant and intervention characteristics, funding sources). Describe any assumptions made about any missing or unclear information.                                                                         | Figure 4                        |
| Study risk of bias assessment | 11     | Specify the methods used to assess risk of bias in the included studies, including details of the tool(s) used, how many reviewers assessed each study and whether they worked independently, and if applicable, details of automation tools used in the process.                    | Line 284-293                    |
| Effect measures               | 12     | Specify for each outcome the effect measure(s) (e.g. risk ratio, mean difference) used in the synthesis or presentation of results.                                                                                                                                                  | N/A                             |
| Synthesis methods             | 13a    | Describe the processes used to decide which studies were eligible for each synthesis (e.g. tabulating the study intervention characteristics and comparing against the planned groups for each synthesis (item #5)).                                                                 | Line 259-266                    |
|                               | 13b    | Describe any methods required to prepare the data for presentation or synthesis, such as handling of missing summary statistics, or data conversions.                                                                                                                                | Line 275-281                    |
|                               | 13c    | Describe any methods used to tabulate or visually display results of individual studies and syntheses.                                                                                                                                                                               | Line 278, Tables S3-5           |
|                               | 13d    | Describe any methods used to synthesize results and provide a rationale for the choice(s). If meta-analysis was performed, describe the model(s), method(s) to identify the presence and extent of statistical heterogeneity, and software package(s) used.                          | N/A                             |
|                               | 13e    | Describe any methods used to explore possible causes of heterogeneity among study results (e.g. subgroup analysis, meta-regression).                                                                                                                                                 | N/A                             |
|                               | 13f    | Describe any sensitivity analyses conducted to assess robustness of the synthesized results.                                                                                                                                                                                         | N/A                             |
| Reporting bias assessment     | 14     | Describe any methods used to assess risk of bias due to missing results in a synthesis (arising from reporting biases).                                                                                                                                                              | Line 284-293                    |
| Certainty assessment          | 15     | Describe any methods used to assess certainty (or confidence) in the body of evidence for an outcome.                                                                                                                                                                                | N/A                             |
| <b>RESULTS</b>                |        |                                                                                                                                                                                                                                                                                      |                                 |
| Study selection               | 16a    | Describe the results of the search and selection process, from the number of records identified in the search to the number of studies included in the review, ideally using a flow diagram.                                                                                         | Figure 1                        |
|                               | 16b    | Cite studies that might appear to meet the inclusion criteria, but which were excluded, and explain why they were excluded.                                                                                                                                                          |                                 |
| Study characteristics         | 17     | Cite each included study and present its characteristics.                                                                                                                                                                                                                            | Table 2                         |
| Risk of bias in studies       | 18     | Present assessments of risk of bias for each included study.                                                                                                                                                                                                                         | Line 284-293                    |
| Results of individual studies | 19     | For all outcomes, present, for each study: (a) summary statistics for each group (where appropriate) and (b) an effect estimate and its precision (e.g. confidence/credible interval), ideally using structured tables or plots.                                                     | N/A                             |
| Results of syntheses          | 20a    | For each synthesis, briefly summarise the characteristics and risk of bias among contributing studies.                                                                                                                                                                               | Line 284-293                    |
|                               | 20b    | Present results of all statistical syntheses conducted. If meta-analysis was done, present for each the summary estimate and its precision (e.g. confidence/credible interval) and measures of statistical heterogeneity. If comparing groups, describe the direction of the effect. | N/A                             |

| Section and Topic                              | Item # | Checklist item                                                                                                                                                                                                                             | Location where item is reported |
|------------------------------------------------|--------|--------------------------------------------------------------------------------------------------------------------------------------------------------------------------------------------------------------------------------------------|---------------------------------|
|                                                | 20c    | Present results of all investigations of possible causes of heterogeneity among study results.                                                                                                                                             | N/A                             |
|                                                | 20d    | Present results of all sensitivity analyses conducted to assess the robustness of the synthesized results.                                                                                                                                 | N/A                             |
| Reporting biases                               | 21     | Present assessments of risk of bias due to missing results (arising from reporting biases) for each synthesis assessed.                                                                                                                    | Line 284-293                    |
| Certainty of evidence                          | 22     | Present assessments of certainty (or confidence) in the body of evidence for each outcome assessed.                                                                                                                                        | N/A                             |
| <b>DISCUSSION</b>                              |        |                                                                                                                                                                                                                                            |                                 |
| Discussion                                     | 23a    | Provide a general interpretation of the results in the context of other evidence.                                                                                                                                                          | Line 172-202                    |
|                                                | 23b    | Discuss any limitations of the evidence included in the review.                                                                                                                                                                            | Line 172-202                    |
|                                                | 23c    | Discuss any limitations of the review processes used.                                                                                                                                                                                      | Line 212-218                    |
|                                                | 23d    | Discuss implications of the results for practice, policy, and future research.                                                                                                                                                             | Line 202-231                    |
| <b>OTHER INFORMATION</b>                       |        |                                                                                                                                                                                                                                            |                                 |
| Registration and protocol                      | 24a    | Provide registration information for the review, including register name and registration number, or state that the review was not registered.                                                                                             | Line 238-241                    |
|                                                | 24b    | Indicate where the review protocol can be accessed, or state that a protocol was not prepared.                                                                                                                                             | Line 238-241                    |
|                                                | 24c    | Describe and explain any amendments to information provided at registration or in the protocol.                                                                                                                                            | N/A                             |
| Support                                        | 25     | Describe sources of financial or non-financial support for the review, and the role of the funders or sponsors in the review.                                                                                                              | Line 302-306                    |
| Competing interests                            | 26     | Declare any competing interests of review authors.                                                                                                                                                                                         | Line 310                        |
| Availability of data, code and other materials | 27     | Report which of the following are publicly available and where they can be found: template data collection forms; data extracted from included studies; data used for all analyses; analytic code; any other materials used in the review. | Line 296-297                    |

28  
29  
30  
31

From: Page MJ, McKenzie JE, Bossuyt PM, Boutron I, Hoffmann TC, Mulrow CD, et al. The PRISMA 2020 statement: an updated guideline for reporting systematic reviews. *BMJ* 2021;372:n71. doi: 10.1136/bmj.n71

For more information, visit: <http://www.prisma-statement.org/>

32
